# Supplementary material for: Rationally Designed Novel Phenyloxazoline Synthase Inhibitors: Chemical Synthesis and Biological Evaluation to Accelerate the Discovery of New Antimycobacterial Antibiotics
Source: MDPI journal article supplement (doi:10.3390/molecules28248115), 2023-12-15
Supplement: s1 [file s1]

## Supporting Information

# Rationally Designed Novel Phenyloxazoline Synthase Inhibitors: Chemical Synthesis and Biological Evaluation to Accelerate the Discovery of New Antimycobacterial Antibiotics

Mousumi Shyam<sup>1,2</sup>, Gourab Bhattacharje<sup>3</sup>, Chris Daniel<sup>2</sup>, Amrendra Kumar<sup>4</sup>, Pragya Yadav<sup>4</sup>, Piyali Mukherjee<sup>5</sup>, Samsher Singh<sup>5,†</sup>, Amit Kumar Das<sup>3</sup>, Narender Tadigoppula<sup>4</sup>, Amit Singh<sup>5</sup>, Venkatesan Jayaprakash<sup>1\*</sup> and Sanjib Bhakta<sup>2\*</sup>

<sup>1</sup>Department of Pharmaceutical Sciences & Technology, Birla Institute of Technology, Mesra, Ranchi 835215 (Jharkhand), India

<sup>2</sup>Mycobacteria Research Laboratory, School of Natural Sciences, Institute of Structural and Molecular Biology, Birkbeck, University of London, Malet Street, London WC1E 7HX, UK

<sup>3</sup>Department of Biotechnology, Indian Institute of Technology Kharagpur, Kharagpur 721302, India

<sup>4</sup>Division of Medicinal & Process Chemistry, CSIR-Central Drug Research Institute, Sector 10 Janakipuram Extension, Sitapur Road, Lucknow 226031, India

<sup>5</sup>Department of Microbiology and Cell Biology and Centre for Infectious Disease Research, Indian Institute of Science, CV Raman Avenue, Bangalore 560012, India

<sup>#</sup>Current address; Nanyang Technological University, Lee Kong Chian School of Medicine, Singapore 308232

\*Correspondence; [venkatessanj@bitmesra.ac.in](mailto:venkatessanj@bitmesra.ac.in); Tel: +91-9470137264; [s.bhakta@bbk.ac.uk](mailto:s.bhakta@bbk.ac.uk) /[sanjib.bhakta@ucl.ac.uk](mailto:sanjib.bhakta@ucl.ac.uk); Tel: +44-20 3926 3505

## Table of Contents

| Title                                                                                                      | Page Number |
|------------------------------------------------------------------------------------------------------------|-------------|
| <sup>1</sup> H-NMR, <sup>13</sup> C-NMR, HRMS spectra TSA (1-5)<br>Depts 135 and Depts 90 spectra of TSA-1 | 2           |
| Ramachandran Plot of MbtB-Cy                                                                               | 11          |
| Accumulation of ethidium bromide (EtBr) in <i>M. abscessus</i> in the presence of <b>TSA-5</b>             | 12          |

### Supplementary Figure S1. <sup>1</sup>H-NMR, <sup>13</sup>C-NMR, HRMS, Depts 135 and Depts 90 spectra of TSA (1-5):

All the newly synthesized compounds were characterized by <sup>1</sup>H-NMR, <sup>13</sup>C-NMR, and HRMS spectroscopic analysis. Compound TSA-1 is additionally characterized by Depts 90 and Depts 135 analysis.

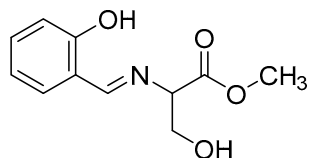[illegible]

# 100 MHz <sup>13</sup>C-NMR spectrum of compound TSA-1 in CDCl<sub>3</sub>

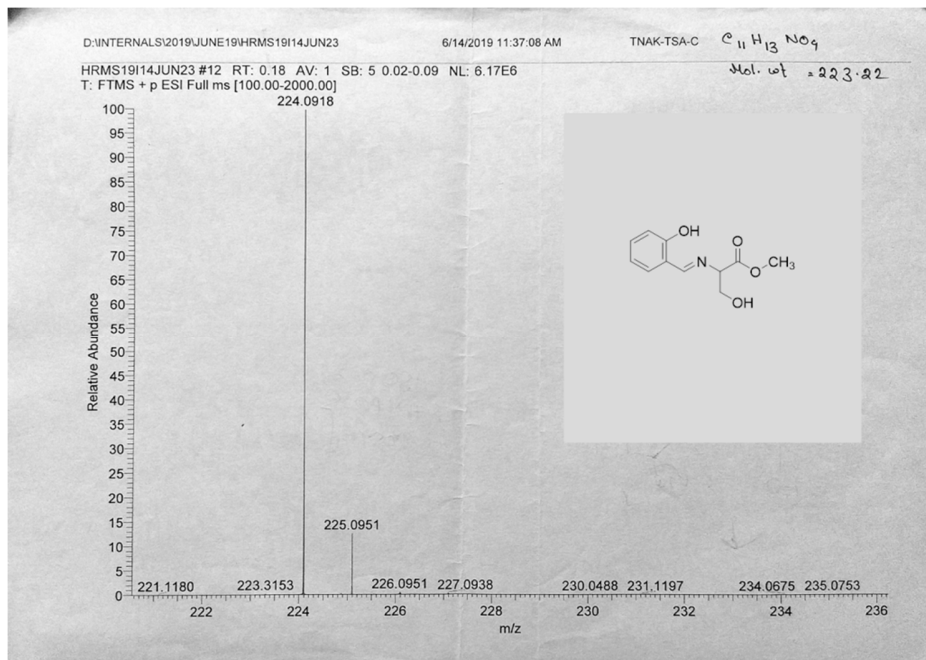

## HRMS spectrum of compound TSA-1

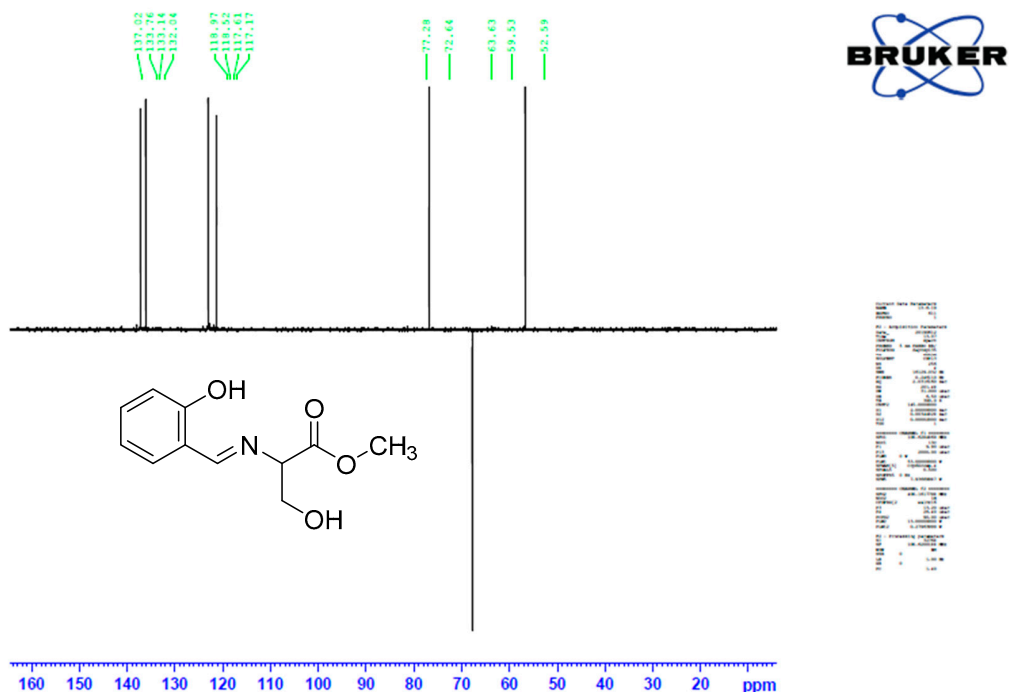

## Depts-135 spectrum of TSA-1

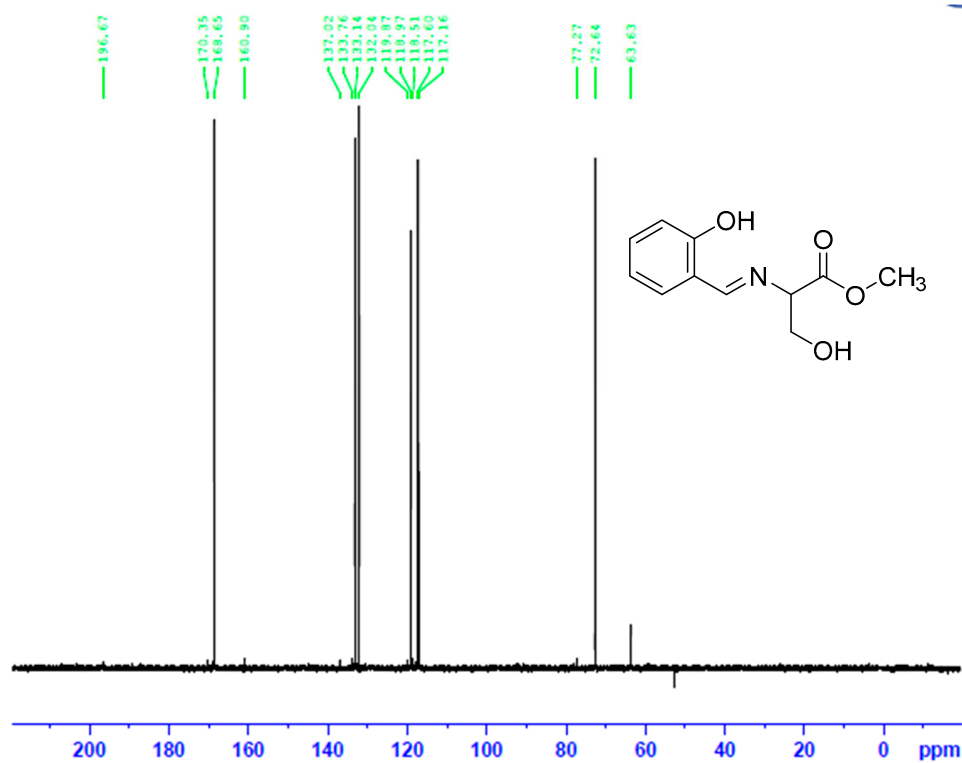

Depts-90 spectrum of TSA-1

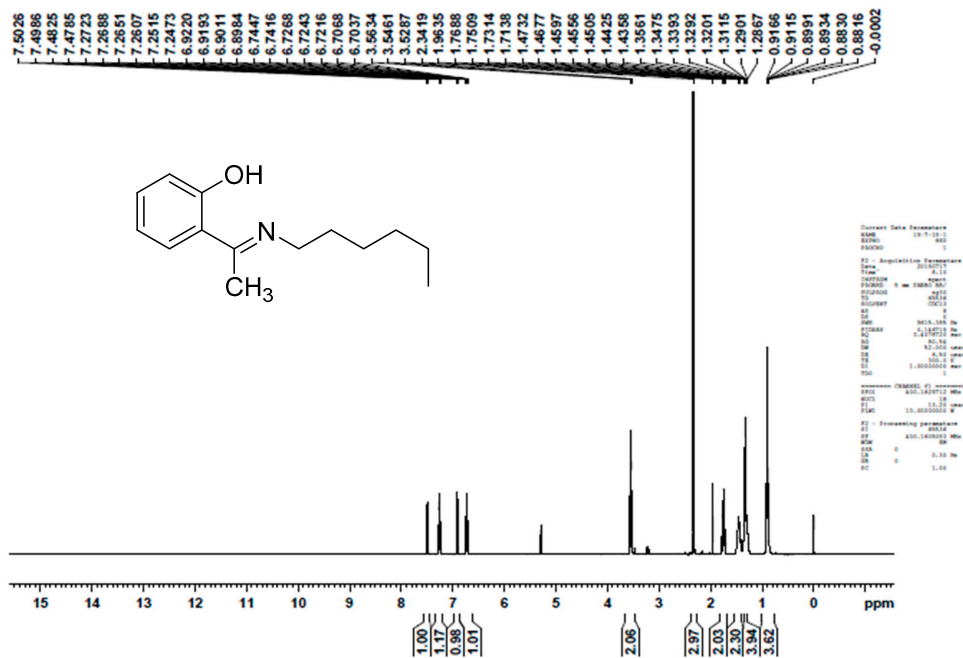

400 MHz <sup>1</sup>H-NMR spectrum of compound TSA-2 in CDCl<sub>3</sub>

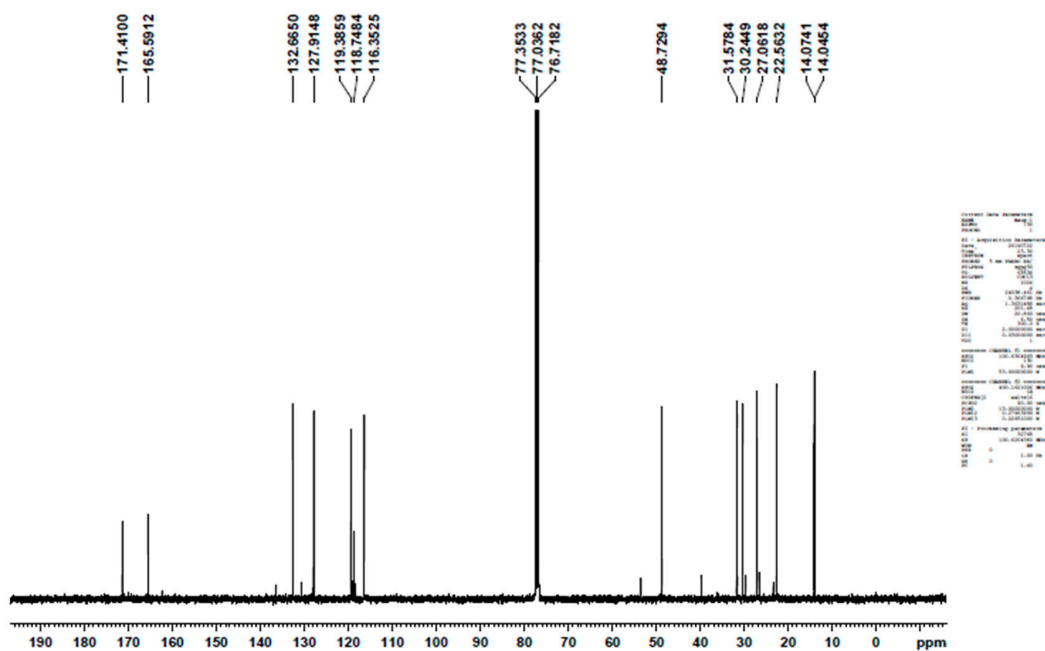

100 MHz  $^{13}\text{C}$ -NMR spectrum of compound TSA-2 in  $\text{CDCl}_3$

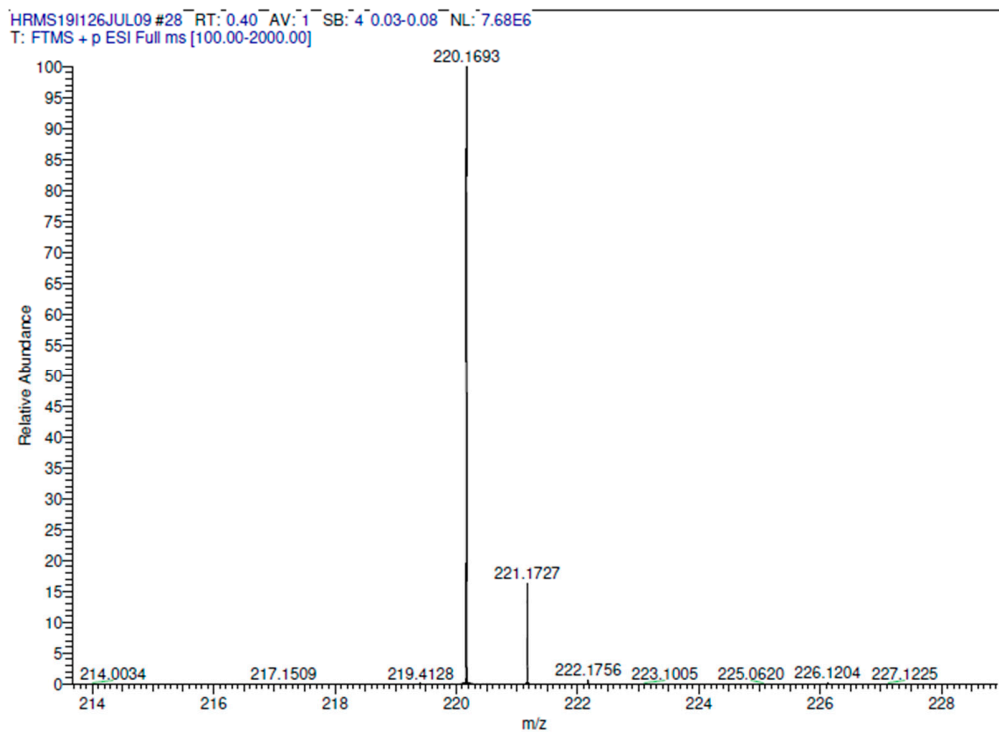

HRMS spectrum of compound TSA-2

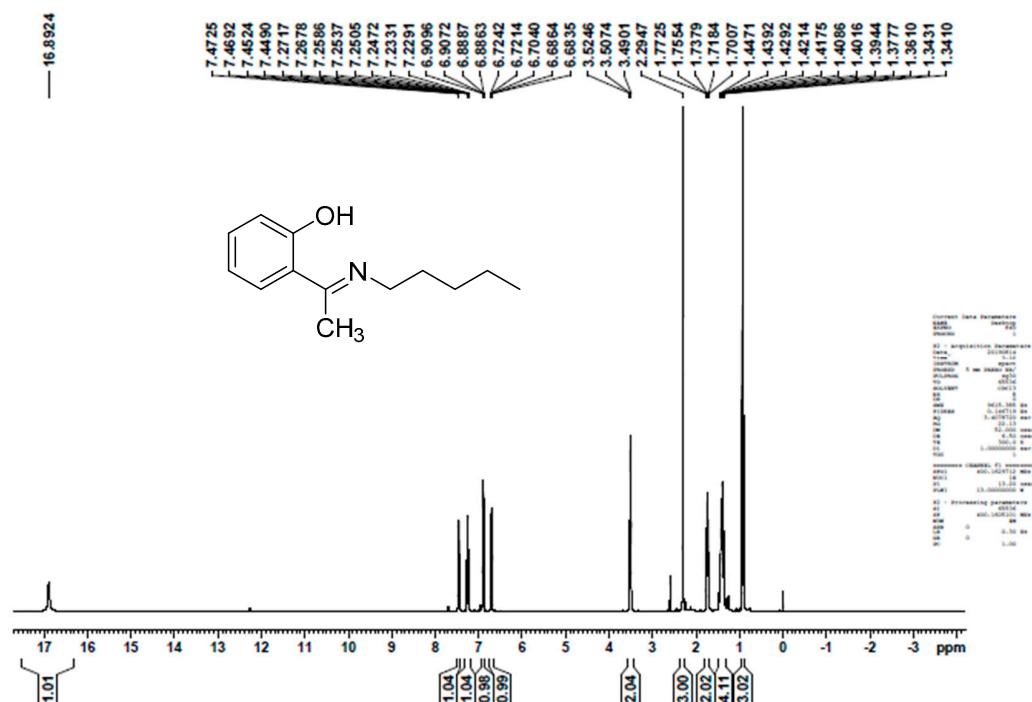

400 MHz  $^1\text{H}$ -NMR spectrum of compound TSA-3 in  $\text{CDCl}_3$

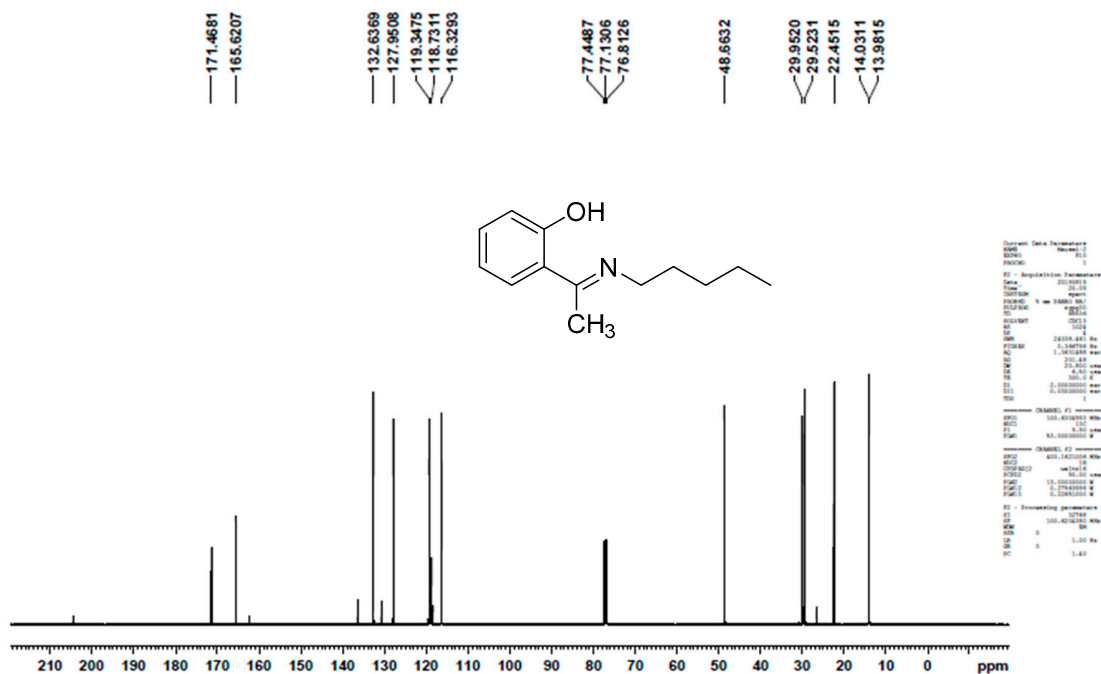

100 MHz  $^{13}\text{C}$ -NMR spectrum of compound TSA-3 in  $\text{CDCl}_3$

HRMS19119AUG01\_190821121931 #10 RT: 0.14 AV: 1 SB: 5 0.02-0.08 NL: 5.60E7  
T: FTMS + p ESI Full ms [100.00-2000.00]

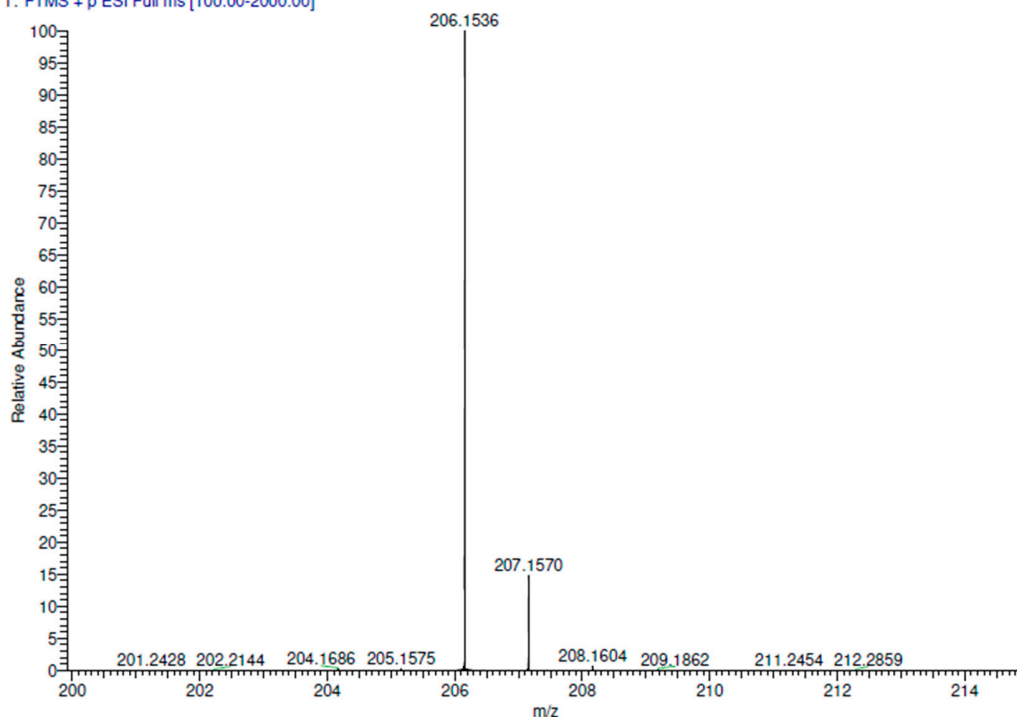

HRMS spectrum of compound TSA-3

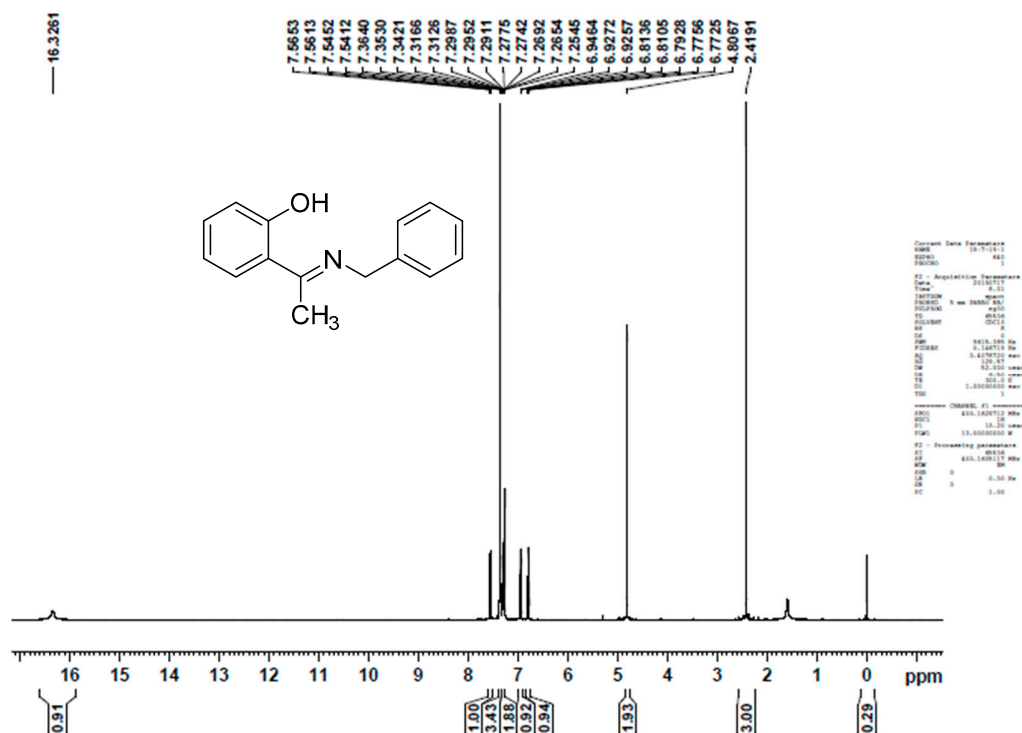



400 MHz  $^1\text{H}$ -NMR spectrum of compound TSA-4 in  $\text{CDCl}_3$

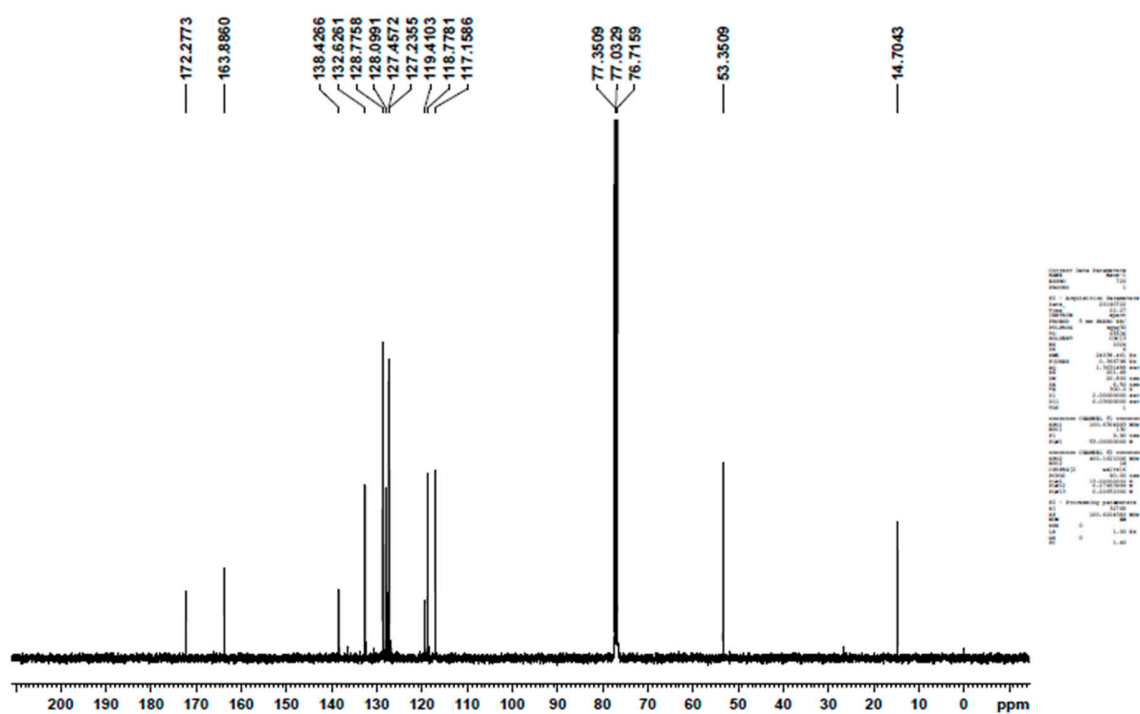

100 MHz  $^{13}\text{C}$ -NMR spectrum of compound TSA-4 in  $\text{CDCl}_3$

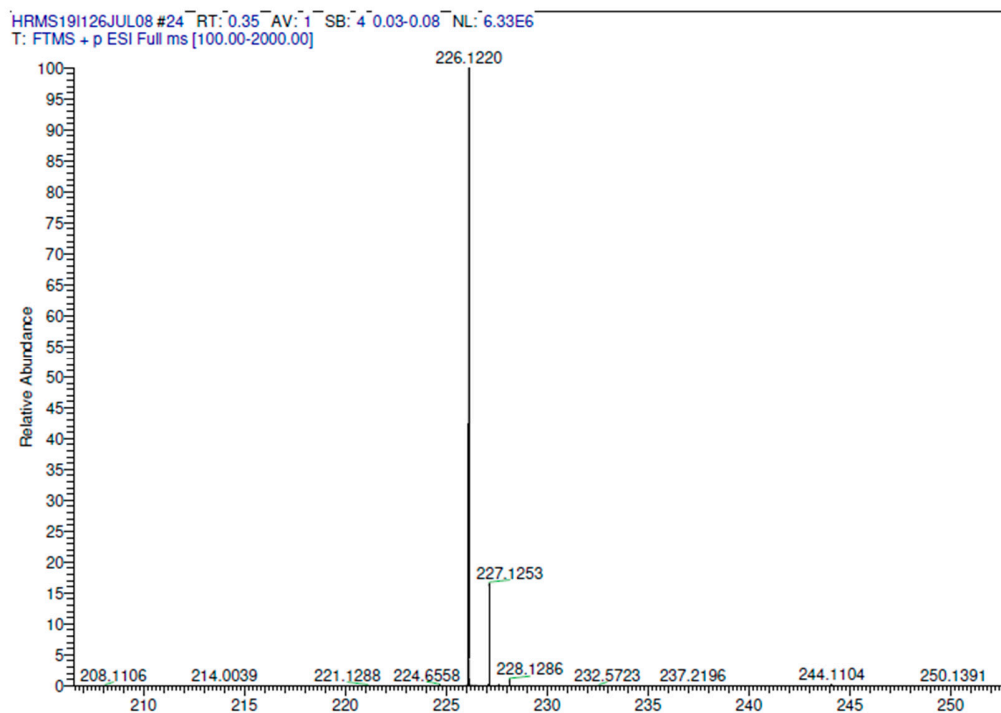

### HRMS spectrum of compound TSA-4

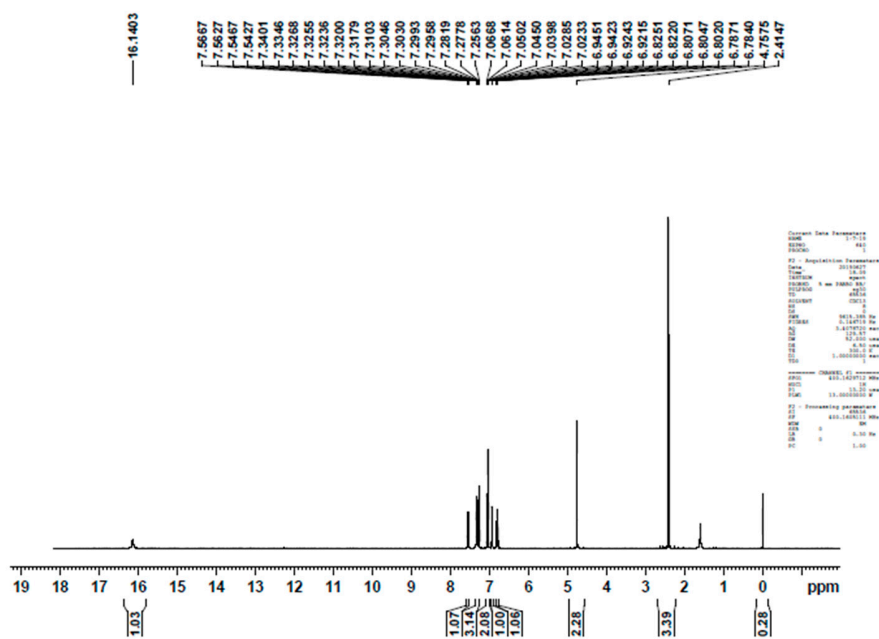

**400 MHz <sup>1</sup>H-NMR spectrum of compound TSA-5 in CDCl<sub>3</sub>**

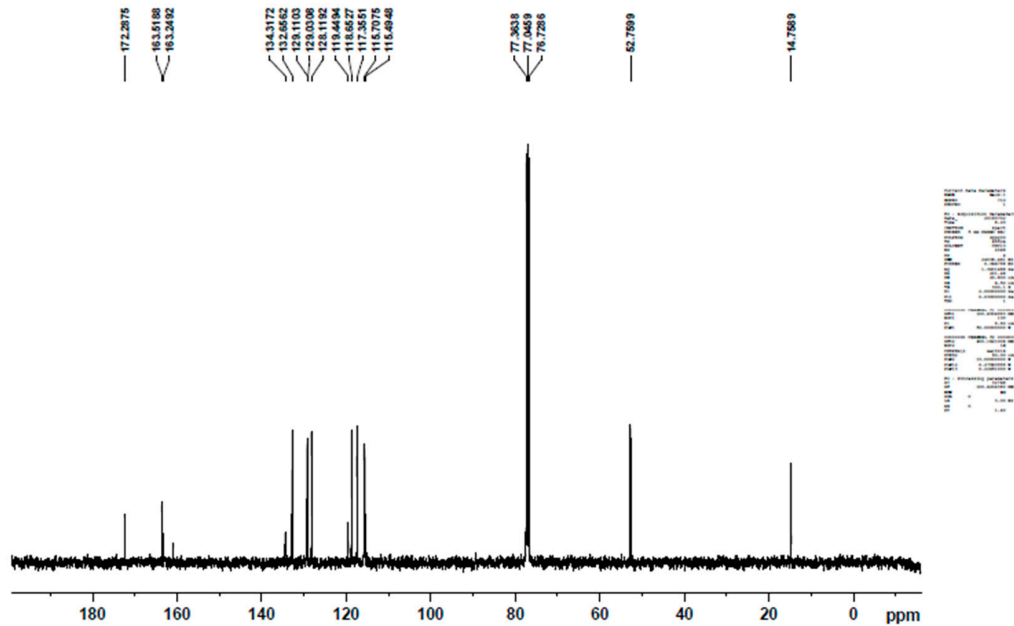

**100 MHz  $^{13}\text{C}$ -NMR spectrum of compound TSA-5 in  $\text{CDCl}_3$**

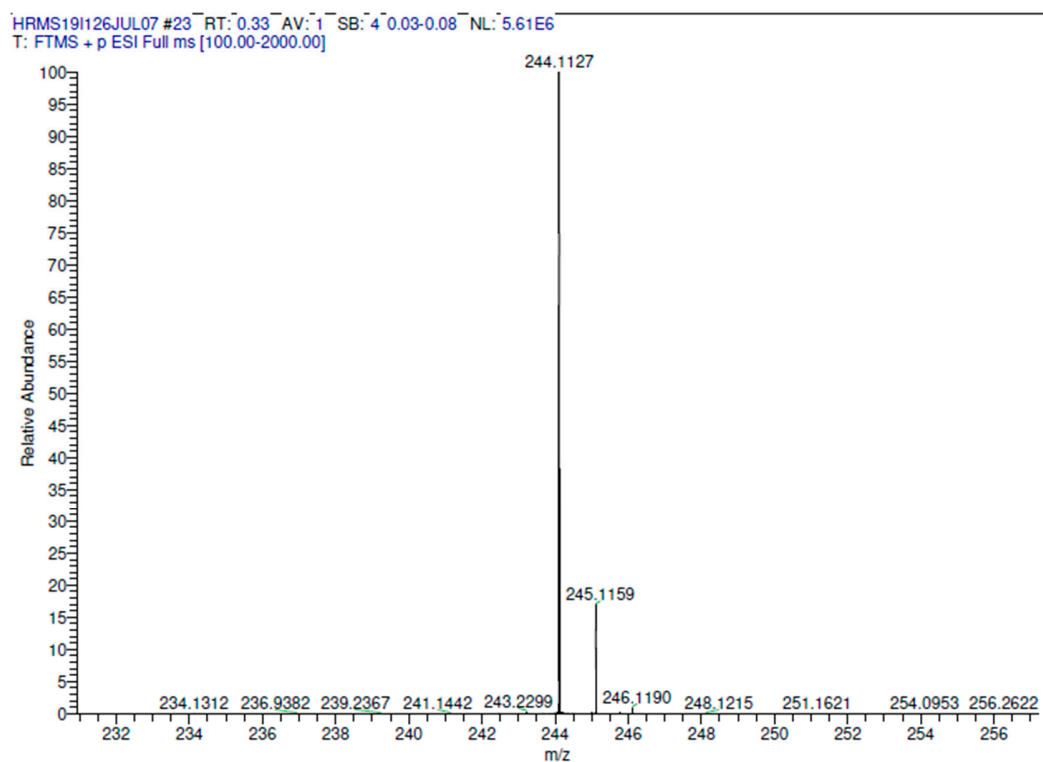

**HRMS spectrum of compound TSA-5**

1. **Supplementary Figure S1:** Ramachandran plot of the protein of interest, MbtB\_Cy

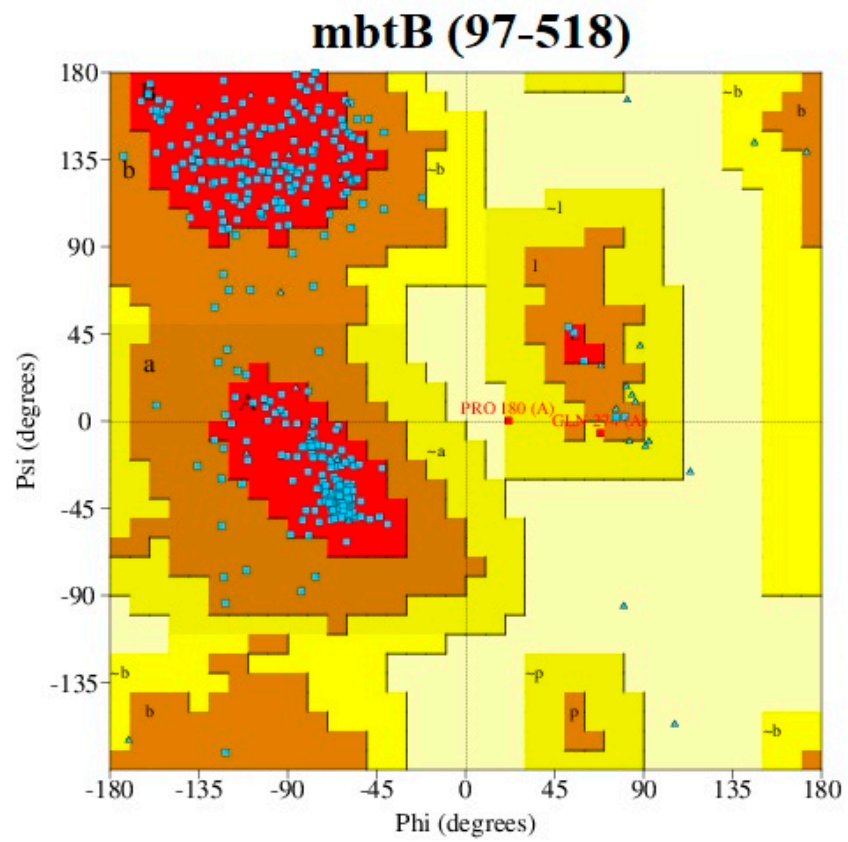

**Supplementary Figure S2:** Efflux-pump inhibition of TSA-5 against *M. abscessus*

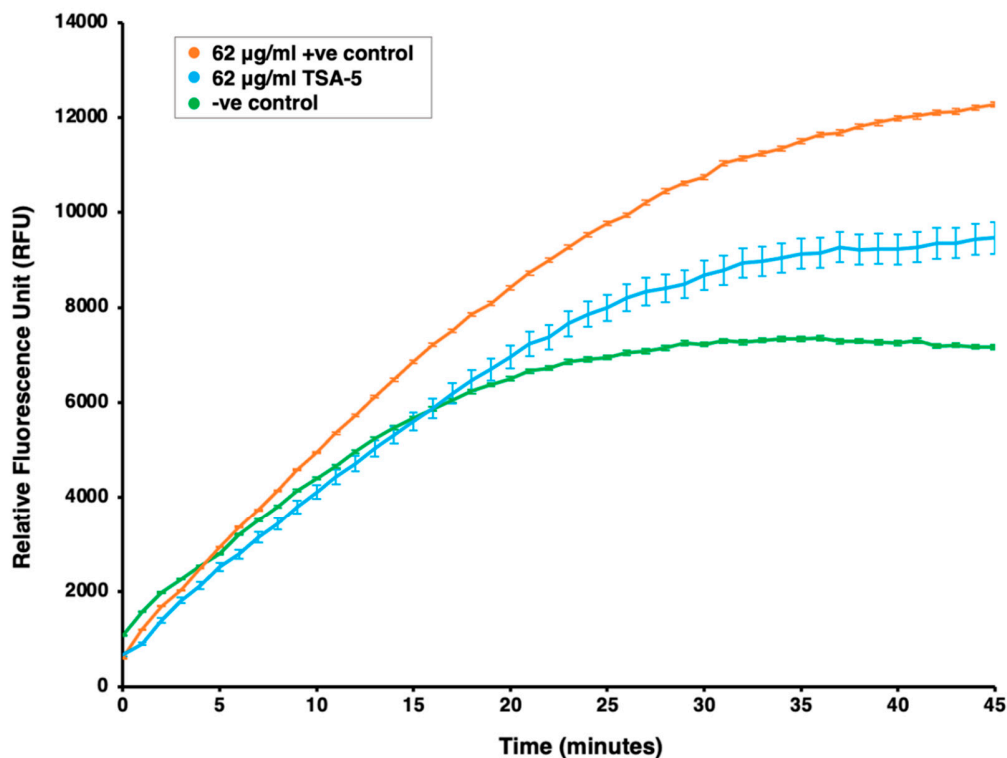

**Supplementary Figure S3.** Accumulation of ethidium bromide (EtBr) in *M. abscessus* cells over a 45-minute time frame, in the presence of TSA-5, positive control (verapamil), and negative control (no inhibitor). Experiment was performed in three biological replicates (n=3), values represent the mean  $\pm$  SD.
